# Supplementary material for: Association of CXCR6 with COVID-19 severity: Delineating the host genetic factors in transcriptomic regulation
Source: PubMed Central journal article supplement — bioRxiv. 2021 Feb 19:2021.02.17.431554. Preprint. [Version 2] doi: 10.1101/2021.02.17.431554 (PMC7899454; doi:10.1101/2021.02.17.431554), 2021-02-19
Supplement: media-1.pdf [file media-1.pdf]

Supplementary data for

**Association of *CXCR6* with COVID-19 severity: Delineating the host genetic factors in transcriptomic regulation**

Dai et al.

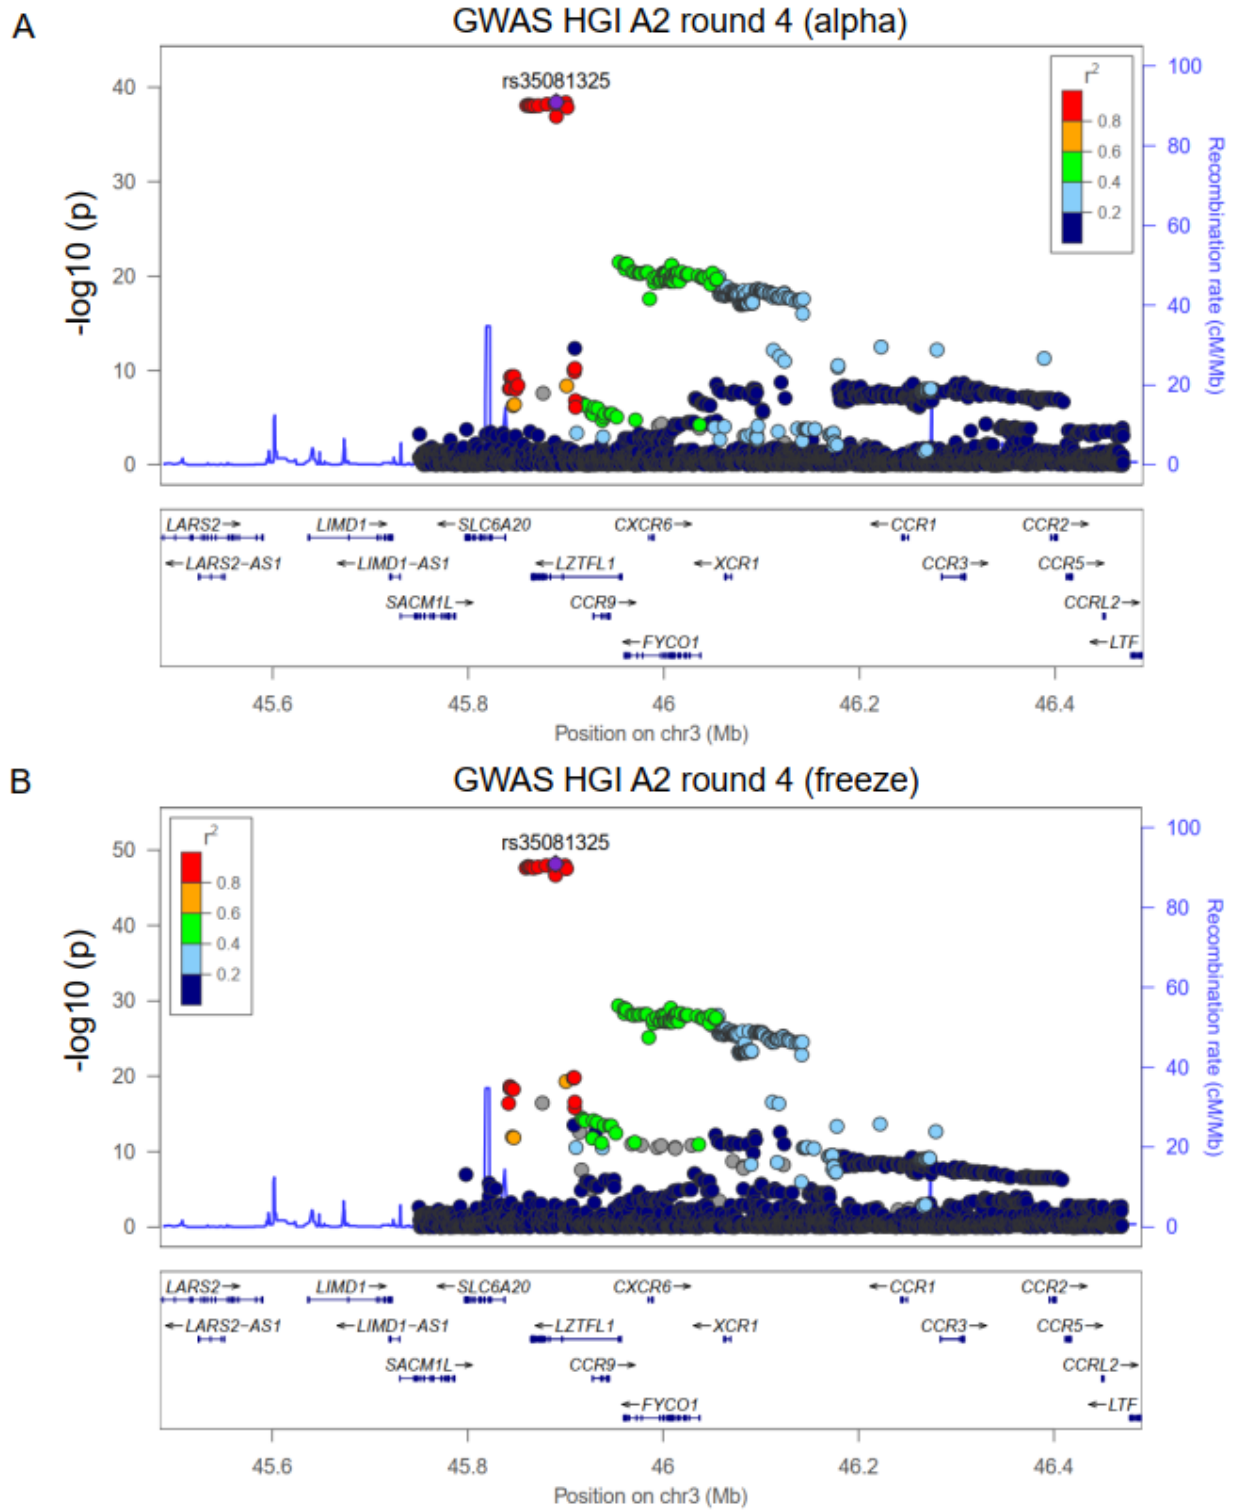

**Fig. S1. Sequence logos representing DNA binding site generated from position weight matrix (PWM) for transcription factor RELA and SP1. In (a) and (b), the SNPs rs10490770**

(T/C) and rs67959919 (G/A) were predicted to have the strongest impact on their sequence (GTGGATTTTCA - Reverse strand,  $p = 9.8 \times 10^{-4}$  and TACCCGCCGG - Reverse strand,  $p = 9.3 \times 10^{-4}$ ) by utilizing the RSAT online tool (**Additional file 1: Table S1**). The polymorphism site within the transcription factor binding site is highlighted in the red box.

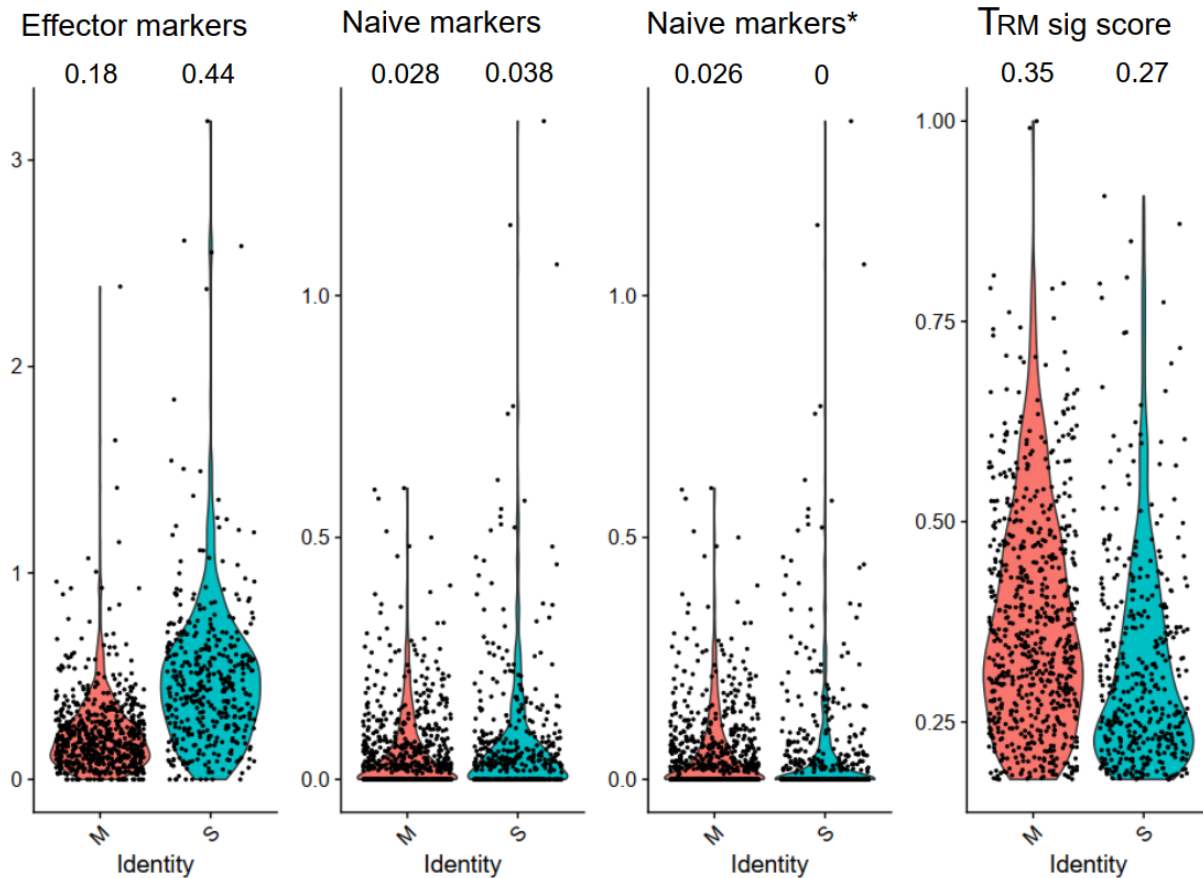

**Fig. S2. Violin plots showing the distribution of key features between moderate and severe patients.** We calculated the proportion of the effector and naïve T cell markers expressed in each cell. The naïve markers include *BCL2*, *SELL*, *KLF2*, *CCR7*, *TCF7*, *LEF1*, *ID3*, *BACH2*, and *IL7R*. And the effector markers include *GZMB*, *PRF1*, *IRF4*, *IFNG*, *TNFRSF9*, *PDCD1*, *LAG3*, *HAVCR2*, *TOX*, and *NR4A2*. Median score of each category is on the top of each violin plot accordingly. The “\*” on the third column denotes the naïve markers without *SELL* gene. The

“ $T_{RM}$  sig score” was calculated from the 31  $T_{RM}$  signature genes described in Methods. The M and S represent moderate and severe patients, respectively.

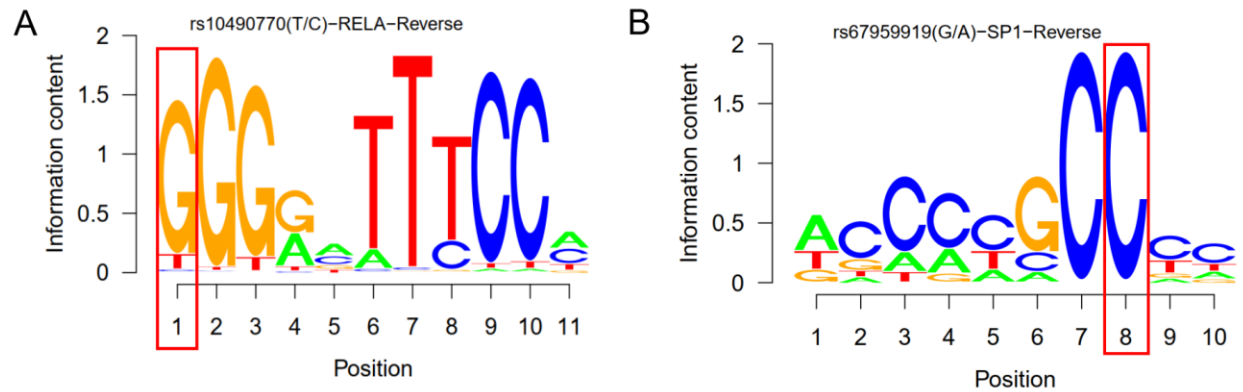

**Fig. S3. LocusZoom views for two Host Genetics Initiates GWAS datasets at *3p21.31* locus.**

In (a) and (b), the x-axis is the chromosome position in million base pairs (Mb) on GRCh37 reference genome and y-axis is the SNP  $-\log_{10}$  (p-value) from the two GWAS<sub>HGI</sub> datasets (round 4 alpha and round 4 freeze). The color indicates the strength of linkage disequilibrium to the lead SNP rs35081325.

**Table S1: Hallmark pathways and their relevance scores**

| Hallmark pathway                  | Relevance score |
|-----------------------------------|-----------------|
| INTERFERON_GAMMA_RESPONSE         | 0.704           |
| ALLOGRAFT_REJECTION               | 0.656           |
| INTERFERON_ALPHA_RESPONSE         | 0.522           |
| MTORC1_SIGNALING                  | 0.434           |
| COMPLEMENT                        | 0.415           |
| HYPOXIA                           | 0.386           |
| P53_PATHWAY                       | 0.315           |
| TNFA_SIGNALING_VIA_NFKB           | 0.263           |
| G2M_CHECKPOINT                    | 0.225           |
| XENOBIOTIC_METABOLISM             | 0.217           |
| APOPTOSIS                         | 0.212           |
| ESTROGEN_RESPONSE_LATE            | 0.200           |
| GLYCOLYSIS                        | 0.185           |
| ANDROGEN_RESPONSE                 | 0.178           |
| KRAS_SIGNALING_UP                 | 0.152           |
| ESTROGEN_RESPONSE_EARLY           | 0.143           |
| MYC_TARGETS_V1                    | 0.131           |
| IL2_STAT5_SIGNALING               | 0.115           |
| UNFOLDED_PROTEIN_RESPONSE         | 0.099           |
| UV_RESPONSE_UP                    | 0.081           |
| OXIDATIVE_PHOSPHORYLATION         | 0.056           |
| EPITHELIAL_MESENCHYMAL_TRANSITION | 0.055           |
| ADIPOGENESIS                      | 0.045           |
| INFLAMMATORY_RESPONSE             | 0.045           |
| DNA_REPAIR                        | 0.004           |
| CHOLESTEROL_HOMEOSTASIS           | -0.002          |
| PROTEIN_SECRETION                 | -0.004          |
| MITOTIC_SPINDLE                   | -0.033          |
| MYC_TARGETS_V2                    | -0.048          |
| FATTY_ACID_METABOLISM             | -0.050          |
| APICAL_JUNCTION                   | -0.056          |
| MYOGENESIS                        | -0.058          |
| PI3K_AKT_MTOR_SIGNALING           | -0.068          |
| IL6_JAK_STAT3_SIGNALING           | -0.086          |
| PEROXISOME                        | -0.087          |
| KRAS_SIGNALING_DN                 | -0.113          |
| E2F_TARGETS                       | -0.120          |
| TGF_BETA_SIGNALING                | -0.122          |

|                                 |        |
|---------------------------------|--------|
| SPERMATOGENESIS                 | -0.126 |
| UV_RESPONSE_DN                  | -0.128 |
| BILE_ACID_METABOLISM            | -0.135 |
| REACTIVE_OXYGEN_SPECIES_PATHWAY | -0.141 |
| COAGULATION                     | -0.167 |
| HEME_METABOLISM                 | -0.202 |

**Table S2: Transcription factors and their relevance scores**

| Transcription factor | Relevance score |
|----------------------|-----------------|
| RELA                 | 0.530           |
| STAT1                | 0.380           |
| NFKB1                | 0.354           |
| MYCN                 | 0.285           |
| HDAC1                | 0.275           |
| USF1                 | 0.267           |
| SP1                  | 0.256           |
| PPARG                | 0.209           |
| CIITA                | 0.183           |
| TWIST2               | 0.108           |
| ETS1                 | 0.094           |
| RFX5                 | 0.094           |
| HIF1A                | 0.092           |
| TWIST1               | 0.089           |
| EGR1                 | 0.071           |
| MYC                  | 0.066           |
| USF2                 | 0.065           |
| CEBPB                | 0.056           |
| ATF4                 | 0.055           |
| CREM                 | 0.024           |
| YY1                  | 0.009           |
| FOS                  | 0.008           |
| JUN                  | 0.005           |
| IRF1                 | 0.003           |
| XBP1                 | -0.009          |
| SP3                  | -0.024          |
| NR3C1                | -0.026          |
| TP53                 | -0.026          |
| AR                   | -0.046          |
| E2F1                 | -0.058          |
| CREB1                | -0.072          |

|        |        |
|--------|--------|
| EP300  | -0.073 |
| ESR1   | -0.077 |
| HSF1   | -0.091 |
| BRCA1  | -0.091 |
| RUNX1  | -0.098 |
| GATA1  | -0.099 |
| ATM    | -0.116 |
| SPI1   | -0.123 |
| DNMT1  | -0.124 |
| TFAP2A | -0.138 |
| STAT3  | -0.156 |
| RUNX3  | -0.159 |
| SIRT1  | -0.182 |
| WT1    | -0.197 |
